# Supplementary material for: Safety Evaluation of Bacillus subtilis IDCC1101, Newly Isolated from Cheonggukjang, for Industrial Applications
Source: MDPI journal article supplement (doi:10.3390/microorganisms10122494), 2022-12-16
Supplement: s1 [file s1]

## Supplementary data

### GLP Statement

**Study title** : Acute oral toxicity study of *Bacillus subtilis* IDCC 1101 in rat

**Study number** : TGK-2021-000125

#### Sponsor

**Name** : ILDONG BIOSCIENCE Co., LTD  
**Address** : 17, Poseunggongdan-ro, Poseung-eup, Pyeongtaek-si, Gyeonggi-do, Republic of Korea  
**Representative** : LEE JANG HYEY  
**Person in charge** : Yo Hwan Kim  
**Department and position** : Quality Control Team Manager  
**Contact Number** : Tel. +82-31-646-3148 Fax, 070-7500-2592

#### Test facility

**Name** : Korea Testing and Research Institute, Hwasun  
**Address** : 12-63, Sandan-gil, Hwasun-eup, Hwasun-gun, Jeollanam-do, Republic of Korea  
**Test facility management** : Park Myeong-kyu  
**Contact Number** : Tel. +82-61-370-7700 Fax, +82-61-370-7777

This study was conducted under the supervision of the study director and is in compliance with the principles of Good Laboratory Practice.

This study was conducted under the supervision of the study director and is in compliance with the principles of Good Laboratory Practice.

#### 1. Good Laboratory Practice

1.1. OECD "Principles of Good Laboratory Practice" ENV/MC/CHEM (98)17 (as revised in 1997)

#### 2. Test regulation

2.1. OECD Guideline for testing of chemicals, Section 4, TG 423 "Acute Oral Toxicity-Acute Toxic Class Method" (Adopted : 17<sup>th</sup> December 2001)

*(Signed in the original report, annex 5)*

**Study director** Jang Seong-yong, M.S.

Date

*(Signed in the original report, annex 5)*

**Test facility management** Hong Seung-guk, M.S.

Date

\* This report was translated a Korean sentence into English according to sponsor's request by study director. The original data had not been changed.

**Translator** Jang Seong-yong, M.S.

Date

- I -

### Quality Assurance Statement

**Study title** : Acute oral toxicity study of *Bacillus subtilis* IDCC 1101 in rat

**Study title** : TGK-2021-000125

| Study Phases                            | Inspections | Reports to study director and Test facility management |
|-----------------------------------------|-------------|--------------------------------------------------------|
| Draft study plan audit                  | 2021-03-25  | 2021-03-25                                             |
| Study plan audit                        | 2021-03-26  | 2021-03-26                                             |
| Animal receipt audit                    | 2021-03-30  | 2021-03-30                                             |
| Body weight audit                       | 2021-03-30  | 2021-03-30                                             |
| Group assignment audit                  | 2021-04-05  | 2021-04-05                                             |
| Preparation of test substance audit (1) | 2021-04-06  | 2021-04-06                                             |
| Preparation of test substance audit (2) | 2021-04-14  | 2021-04-14                                             |
| Test substance administration audit     | 2021-04-06  | 2021-04-06                                             |
| Clinical signs audit (1)                | 2021-04-06  | 2021-04-06                                             |
| Necropsy audit (1)                      | 2021-04-20  | 2021-04-20                                             |
| Necropsy audit (2)                      | 2021-05-14  | 2021-05-14                                             |
| Raw data audit                          | 2021-05-25  | 2021-05-25                                             |
| Draft final report audit                | 2021-05-25  | 2021-05-25                                             |
| Final report audit                      | 2021-05-27  | 2021-05-27                                             |

Inspections of the routine and repetitive procedures that constitute the study was carried out as a continuous process designed to encompass the major phases at or about the time this study was in progress.

This report has been audited by Quality Assurance Unit of Korea Testing and Research Institute, Hwasun and is considered to be an accurate account of the raw data generated and of the procedures followed.

Inspections were accomplished as noted, and reported to the study director and management immediately following their completion. Based on these inspections and the review of the report, this study was conducted and reported in conformance with the Good Laboratory Practice regulations.

**Quality assurance personnel**

*(Signed in the original report, annex 6)*

Seo Mu-yeb, M.S.

Date

- II -

**Figure S1.** The GLP and quality assurance statements for acute oral toxicity study of BS IDCC1101.

**Table S1.** Summary of BLASTn screening results of *B. subtilis* IDCC1101.

| Description                                                            | Accession  | Coverage | E-value | Identities (%) |
|------------------------------------------------------------------------|------------|----------|---------|----------------|
| <i>Bacillus subtilis</i> strain SRCM103971 chromosome, complete genome | CP035166.1 | 34.35    | 0.0     | 99             |
| <i>Bacillus</i> sp. LM 4-2, complete genome                            | CP011101.1 | 34.7     | 0.0     | 99             |
| <i>Bacillus subtilis</i> strain SRCM103551 chromosome, complete genome | CP035230.1 | 12.96    | 0.0     | 99             |
| <i>Bacillus subtilis</i> strain QB61 chromosome, complete genome       | CP029461.2 | 11.21    | 0.0     | 99             |
| <i>Bacillus subtilis</i> strain SRCM103696 chromosome, complete genome | CP035394.1 | 11.07    | 0.0     | 99             |

(A)

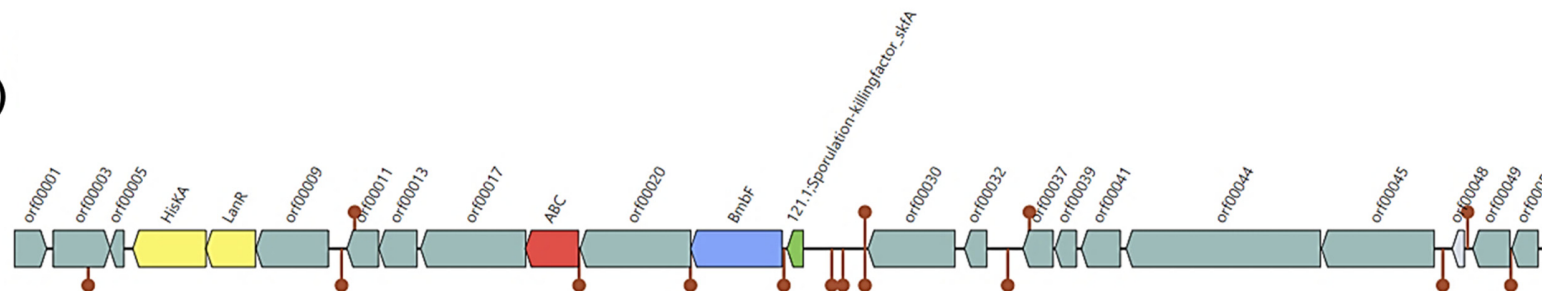

(B)

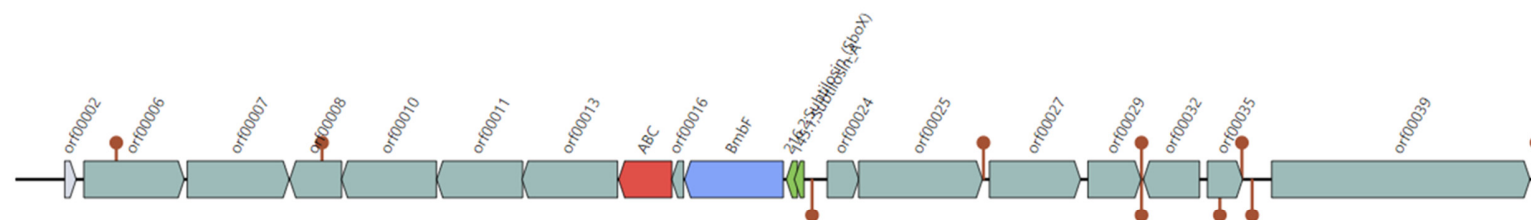

■ Blast hit with UniRef90  
■ Core Peptide  
■ Modification  
■ Immunity / Transport  
■ Regulation

Figure S2. Organization of bacteriocin cluster genes.

**Table S2.** Biochemical properties of *Bacillus subtilis* reported for use as a commercial probiotic

| <i>B. subtilis</i> | Source        | Antibiotic resistance<br>(MIC µg/mL) | Enzyme<br>activity | L-/D-<br>lactate | BA <sup>1)</sup> | Hemolytic<br>activity | Cell cytotoxicity |              | Acute oral<br>toxicity | Ref. |
|--------------------|---------------|--------------------------------------|--------------------|------------------|------------------|-----------------------|-------------------|--------------|------------------------|------|
|                    |               |                                      |                    |                  |                  |                       | Cell              | Cytotoxicity |                        |      |
| BS IDCC1101        | Cheonggukjang | Streptomycin (64)                    | ND                 | ND               | ND               | γ                     | HaCaT             | Non-toxic    | Non-adverse            |      |
| BS50               | Soil          | Streptomycin (125)                   | - <sup>2)</sup>    | -                | -                | α                     | Caco-2            | Non-toxic    | -                      | [1]  |
| CU1                | Soil/water    | ND                                   | -                  | -                | -                | γ                     | Vero              | Non-toxic    | -                      | [2]  |
| MB40               | Soil          | Streptomycin (>32)                   | -                  | -                | -                | -                     | -                 | -            | Non-adverse            | [3]  |
| Natto              | Natto         | ND                                   | -                  | -                | -                | γ                     | HT29-16E          | Non-toxic    | Non-adverse            | [4]  |
| PY79               | Straw         | -                                    | -                  | -                | -                | -                     | HEp-2, Caco-2     | Non-toxic    | -                      | [5]  |
| VKPM B2335         | Straw         | Oxacillin*                           | -                  | -                | -                | γ                     | Caco-2 and mucin  | Low adhesion | Non-adverse            | [6]  |
| KATMIRA1933        | Yogu Farm     | Streptomycin,<br>bacitracin*         | -                  | -                | -                | β                     | -                 | -            | -                      | [7]  |

<sup>1)</sup> BA: biogenic amine.

<sup>2)</sup> -: not tested; ND: not detected.

\*MIC was not investigated since they used paper disc method.

**Table S3.** Mortality and Clinical signs of female rats.

| Group | Dose<br>(mg/kg B.W.) | Mortality                | Animal<br>number | Hours after<br>administration |   |   |   |   | Days after administration |   |   |   |   |   |   |   |   |    |    |    |    |    |
|-------|----------------------|--------------------------|------------------|-------------------------------|---|---|---|---|---------------------------|---|---|---|---|---|---|---|---|----|----|----|----|----|
|       |                      |                          |                  | 0.5                           | 1 | 2 | 3 | 4 | 1                         | 2 | 3 | 4 | 5 | 6 | 7 | 8 | 9 | 10 | 11 | 12 | 13 | 14 |
| G1    | 300                  | 0%<br>(0/3) <sup>a</sup> | 2101             | N                             | N | N | N | N | N                         | N | N | N | N | N | N | N | N | N  | N  | N  | N  | N  |
|       |                      |                          | 2102             | N                             | N | N | N | N | N                         | N | N | N | N | N | N | N | N | N  | N  | N  | N  | N  |
|       |                      |                          | 2103             | N                             | N | N | N | N | N                         | N | N | N | N | N | N | N | N | N  | N  | N  | N  | N  |
| G2    | 300                  | 0%<br>(0/3)              | 2201             | N                             | N | N | N | N | N                         | N | N | N | N | N | N | N | N | N  | N  | N  | N  | N  |
|       |                      |                          | 2202             | N                             | N | N | N | N | N                         | N | N | N | N | N | N | N | N | N  | N  | N  | N  | N  |
|       |                      |                          | 2203             | N                             | N | N | N | N | N                         | N | N | N | N | N | N | N | N | N  | N  | N  | N  | N  |
| G3    | 2000                 | 0%<br>(0/3)              | 2301             | N                             | N | N | N | N | N                         | N | N | N | N | N | N | N | N | N  | N  | N  | N  | N  |
|       |                      |                          | 2302             | N                             | N | N | N | N | N                         | N | N | N | N | N | N | N | N | N  | N  | N  | N  | N  |
|       |                      |                          | 2303             | N                             | N | N | N | N | N                         | N | N | N | N | N | N | N | N | N  | N  | N  | N  | N  |
| G4    | 2000                 | 0%<br>(0/3)              | 2401             | N                             | N | N | N | N | N                         | N | N | N | N | N | N | N | N | N  | N  | N  | N  | N  |
|       |                      |                          | 2402             | N                             | N | N | N | N | N                         | N | N | N | N | N | N | N | N | N  | N  | N  | N  | N  |
|       |                      |                          | 2403             | N                             | N | N | N | N | N                         | N | N | N | N | N | N | N | N | N  | N  | N  | N  | N  |

B.W.: Body weight, <sup>a</sup>: Number of dead animals/Number of tested animals, N: Normal

**Table S4.** Necropsy findings of female rats.

| Group | Dose<br>(mg/kg B.W.) | Animal<br>number | Removal<br>reason  | Necropsy findings |                   |
|-------|----------------------|------------------|--------------------|-------------------|-------------------|
|       |                      |                  |                    | External          | Internal          |
| G1    | 300                  | 2101             | Terminal sacrifice | No gross findings | No gross findings |
|       |                      | 2102             | Terminal sacrifice | No gross findings | No gross findings |
|       |                      | 2103             | Terminal sacrifice | No gross findings | No gross findings |
| G2    | 300                  | 2201             | Terminal sacrifice | No gross findings | No gross findings |
|       |                      | 2202             | Terminal sacrifice | No gross findings | No gross findings |
|       |                      | 2203             | Terminal sacrifice | No gross findings | No gross findings |
| G3    | 2000                 | 2301             | Terminal sacrifice | No gross findings | No gross findings |
|       |                      | 2302             | Terminal sacrifice | No gross findings | No gross findings |
|       |                      | 2303             | Terminal sacrifice | No gross findings | No gross findings |
| G4    | 2000                 | 2401             | Terminal sacrifice | No gross findings | No gross findings |
|       |                      | 2402             | Terminal sacrifice | No gross findings | No gross findings |
|       |                      | 2403             | Terminal sacrifice | No gross findings | No gross findings |

B.W.: Body weight

## References

1. Brutscher, L.M.; Borgmeier, C.; Garvey, S.M.; Spears, J.L. Preclinical Safety Assessment of *Bacillus subtilis* BS50 for Probiotic and Food Applications. *Microorganisms* **2022**, *10*, 1038.
2. Lefevre, M.; Racedo, S.M.; Denayrolles, M.; Ripert, G.; Desfougeres, T.; Lobach, A.R.; Simon, R.; Pélerin, F.; Jüsten, P.; Urdaci, M.C. Safety assessment of *Bacillus subtilis* CU1 for use as a probiotic in humans. *Regulatory Toxicology and Pharmacology* **2017**, *83*, 54-65.
3. Spears, J.L.; Kramer, R.; Nikiforov, A.I.; Rihner, M.O.; Lambert, E.A. Safety Assessment of *Bacillus subtilis* MB40 for Use in Foods and Dietary Supplements. *Nutrients* **2021**, *13*, 733.
4. Ruiz Sella, S.R.; Bueno, T.; de Oliveira, A.A.; Karp, S.G.; Soccol, C.R. *Bacillus subtilis* natto as a potential probiotic in animal nutrition. *Critical Reviews in Biotechnology* **2021**, *41*, 355-369.
5. Schroeder, J.W.; Simmons, L.A. Complete genome sequence of *Bacillus subtilis* strain PY79. *Genome announcements* **2013**, *1*, e01085-01013.
6. Sorokulova, I.B.; Pinchuk, I.V.; Denayrolles, M.; Osipova, I.G.; Huang, J.M.; Cutting, S.M.; Urdaci, M.C. The safety of two *Bacillus* probiotic strains for human use. *Digestive diseases and sciences* **2008**, *53*, 954-963.
7. AlGburi, A.; Volski, A.; Cugini, C.; Walsh, E.M.; Chistyakov, V.A.; Mazanko, M.S.; Bren, A.B.; Dicks, L.M.; Chikindas, M.L. Safety properties and probiotic potential of *Bacillus subtilis* KATMIRA1933 and *Bacillus amyloliquefaciens* B-1895. *Advances in Microbiology* **2016**, *6*, 432-452.
